# Supplementary material
Source: publisher site journal article supplement (https://www.dovepress.com/article/360091)
Supplement: Supplementary file 1 [file get_supplementary_file.php]

Appendix 1 Data Integration Matrix

|  | **Questionnaire**  *(QUAN)* | **Interview**  *(QUAL)* | **Comments to integration** |
| --- | --- | --- | --- |
| **Theme 1: Usability of the app** |  |  |  |
| *Overall usability and satisfaction* | Most donor participants found the app easy to use, to navigate and to learn. They reported that they can quickly and easily undo any mistakes they made. They did not need any training or help while using the app. Donor participants intended to continue using the app. However, the results indicated a large discrepancy in ease-of-use scores between older (=/>55 years) and younger (<55 years) participants, suggesting older participants found the Wateen app less easy to use. | Most participants reported that the app is easy to use, to learn and to navigate. Interviewees also noted that people from different age groups are able to use this app, suggesting usability among older people. | Somewhat (**confirmed**), interview and questionnaire are similar in that both groups found the app easy to use, to learn and to navigate. Although healthcare professionals reported that the app can be used by all people regardless of their age, the questionnaire showed that older participants found the Wateen app less easy to use compared with younger people |
| *App accessibility* |  | Concerns were raised about potential difficulty for older people relating to in-app text (small font size) and its inaccessibility to speakers of languages besides Arabic and English. They suggested offering a feature to change font size or zoom in on text. | No integration was found |
| **Theme2: Information and Communication** |  |  |  |
| *App as an informative tool* | Participants reported that the app improved their knowledge and awareness about blood donation. | Interviewees reported that the app is a powerful tool to provide educational information, increase donors’ awareness about blood donation and motivate more people to donate. It was suggested that educational materials could be expanded further, e.g., with the inclusion of advice for donors’ post-donation. | **Expansive**, further detail available from interview that confirms data and adds more suggestions. |
| *App as a communication tool* | Participants reported that the app increases their opportunities to communicate and get easier access to the donation centers particularly the nearest one. They also felt confident to share any information with [Blood center] healthcare providers. | Participants reported that the app enhances communication with donors, making it easier to find and recruit donors and to encourage donors to donate either by sending a request for a specific need or by booking at the nearest center. They had confidence that the app would safeguard donors’ information in accordance with privacy regulations. Interviewees expressed mixed opinions about communicating test results via the app. | **Expansive**, further detail available from interview that **confirms** some data and provides conflicting perspectives. . |
| **Theme 3: Blood donation Quality** |  |  |  |
| *Time and Efforts* | Participants reported that the app saves their time and offers a more effective means to find information and book appointments that meet their needs. | Participants reported that the app saves time and effort for both donors and healthcare professionals. As this app helps donors to select a specific time, date and location, it improves efficiency, resulting in reduced waiting times to donate and reduced latency between demand and supply. | **Expansive**, further detail available from interview that **confirms** data and offers additional insights. |
| *Features that impact donor engagement* | Some participants reported that the rewards function increased their motivation. However, some reported that there were technical problems that affected their engagement with the app, such as failing to present rewards, leading them to contact IT support to resolve this issue. | Interviewees reported that reminders about scheduled donations and record of previous donations would help to improve donor engagement by making them feel more motivated, and increasing their satisfaction. Some interviews suggested that the app could improve donation rates further if it included additional rewards. | **Neither confirmed nor discordant.**  Participants reported different features that encourage them to donate and offered different suggestions for adding/fixing features to increase engagement with the app and improve the supply of blood. |
| *Information about blood donation center* | Participants reported that the app is a good source of information enabling them to easily find and book appropriate appointments, etc. | Interviewees reported that the information, e.g., about donation center locations, was good. Some reported that the app could improve the service further if it also offered information about which hospitals have the most urgent need for blood at any given time. | **Expansive**, further information available from interviews which provides additional insights and suggestions for improvement. |

Appendix 2 Donors Responses

| **Ease of use** | Mean (SDa) |
| --- | --- |
| The application was easy to use | 4.61(0.72) |
| It was easy for me to learn to use the app | 4.17(1.00) |
| All users of the application are easy to learn how to use it quickly | 4.17(1.00) |
| I need help while using the application | 2.77(1.31) |
| The information in the app was well organized, so I was easily able to find the information I needed | 4.22(0.88) |
| Taking any action through the application requires a few steps | 4.07(0.93) |
| I used the app without the need for written instructions | 3.68(0.99) |
| The navigation between pages was consistent | 4.52(0.88) |
| Whenever I made a mistake using the app, I could undo it easily and quickly | 4.47(0.92) |
| The app interface allowed me to use all the tasks the app offers, such as entering information, responding to alerts, and viewing information | 4.15(1.10) |
| **Satisfaction** |  |
| The app provided a convenient way to access [find suitable location, time and date] healthcare services | 4.28(0.98) |
| The application provided sufficient information about the application procedures | 4.59(0.75) |
| I experienced problems while using the application | 2.45(1.26) |
| This app contains all the functions/functions and features I expect. |  |
| The time I spent using this app was right for me | 4.25(1.15) |
| I liked the application interface | 4.45(0.83) |
| I found all the services, tasks, or functions of the application are well connected |  |
| I feel the community is in desperate need of this app | 4.58 (0.51) |
| Recommend friends to use this app | 4.56(0.55) |
| I will continue to use the app | 4.15(1.10) |
| In general, I am satisfied with this app | 4.59(0.51) |
| **Potential Benefits** |  |
| The app will be beneficial to my health and well-being | 4.17(1.00) |
| The app is more effective in providing the necessary healthcare services compared to the traditional way of going to the hospital personally | 4.66(0.66) |
| The app helps me to get easily access to donation blood centers | 4.30(0.80) |
| The app helped me manage my health effectively | 3.96(0.99) |
| The location feature in this app provide me with the nearest location donation or camping for me. | 4.26(0.86) |
| A handy app for me communicating with blood donation centers. | 4.07(0.93) |
| Using the app, I had more opportunities to communicate/interact with blood donation centers | 4.52(0.88) |
| I felt confident that any information shared with Blood donation centers via the app had been received | 4.28(0.71) |
| I felt comfortable communicating with healthcare providers via the app | 4.37(0.92) |
| The app played a key role in improving the blood supply | 4.32(1.04) |
| The app fulfilled all my blood donation needs | 4.23(1.07) |
| The application fulfilled all my requirement more easily. | 4.37(0.65) |
| The application features encourage me to donate more | 4.48(0.86) |

a Standard deviation
